# Supplementary material for: New Insights into the Reactivity of Detonation Nanodiamonds during the First Stages of Graphitization
Source: MDPI journal article supplement (doi:10.3390/nano11102671), 2021-10-11
Supplement: s1 [file s1]

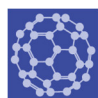

## Supplementary Materials

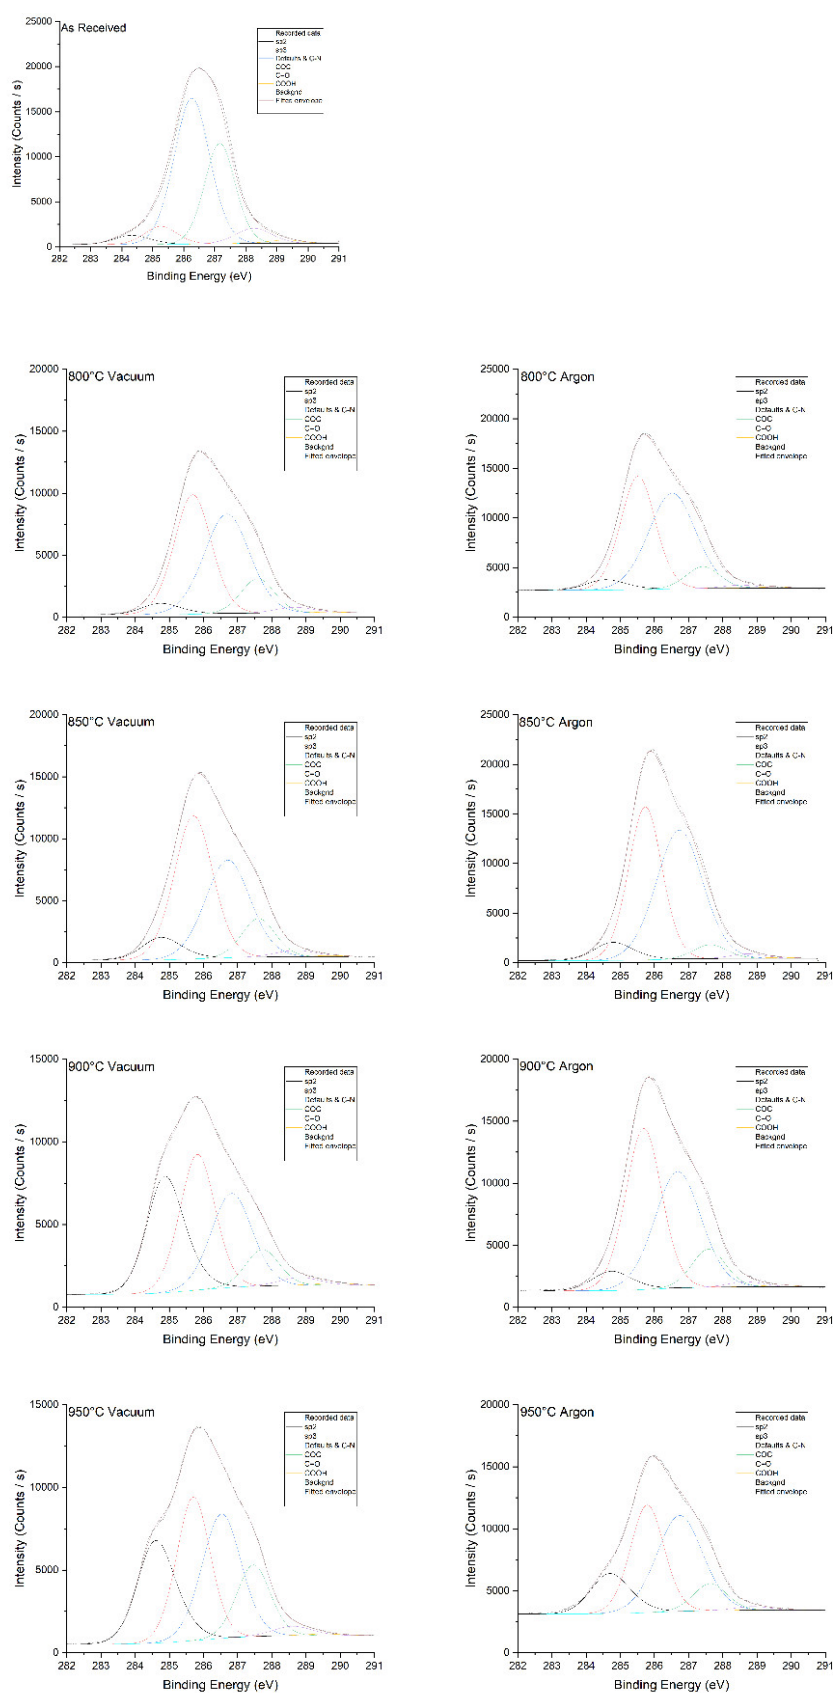

| Argon annealing |                   |                   |                    |       |     |      |
|-----------------|-------------------|-------------------|--------------------|-------|-----|------|
|                 | C sp <sup>2</sup> | C sp <sup>3</sup> | CHx, C-N, defaults | C-O-C | C=O | COOH |
| As received     | 3,5               | 6,0               | 53,0               | 31,0  | 5,5 | 1,0  |
| 800°C 4h        | 4,5               | 40,5              | 46,0               | 7,5   | 1,0 | 0,5  |
| 850°C 4h        | 6,0               | 41,0              | 47,5               | 4,0   | 1,0 | 0,5  |
| 900°C 4h        | 6,0               | 43,0              | 40,0               | 9,5   | 1,0 | 0,5  |
| 950°C 4h        | 15,0              | 34,0              | 41,0               | 8,5   | 1,0 | 0,5  |

  

| Vacuum annealing |                   |                   |                    |       |     |      |
|------------------|-------------------|-------------------|--------------------|-------|-----|------|
|                  | C sp <sup>2</sup> | C sp <sup>3</sup> | CHx, C-N, defaults | C-O-C | C=O | COOH |
| As received      | 3,5               | 6                 | 53                 | 31    | 5,5 | 1    |
| 800°C 4h         | 4,5               | 41                | 41,5               | 10,5  | 2   | 0,5  |
| 850°C 4h         | 7,5               | 45                | 35                 | 10    | 2   | 0,5  |
| 900°C 4h         | 30                | 32,5              | 26,5               | 8,5   | 2   | 0,5  |
| 950°C 4h         | 24                | 29                | 30                 | 14,5  | 2   | 0,5  |

**Figure S1.** Fitted XPS C1s core levels and associated values.

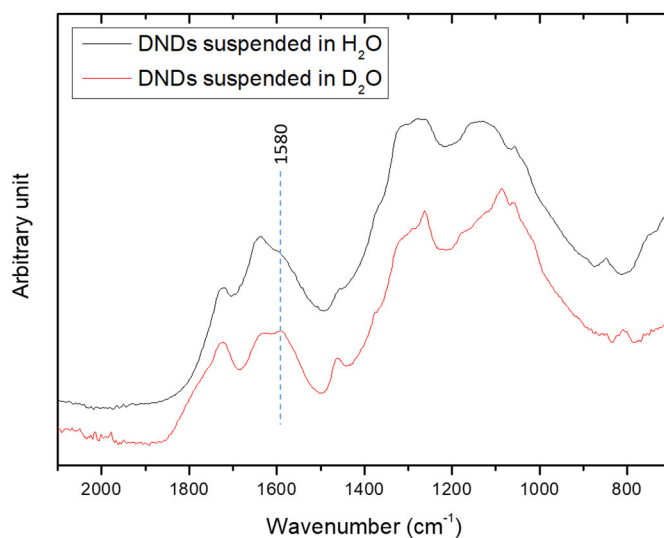

**Figure S2.** FTIR of DNDs annealed at 800 °C for 4 h suspended in H<sub>2</sub>O and D<sub>2</sub>O.

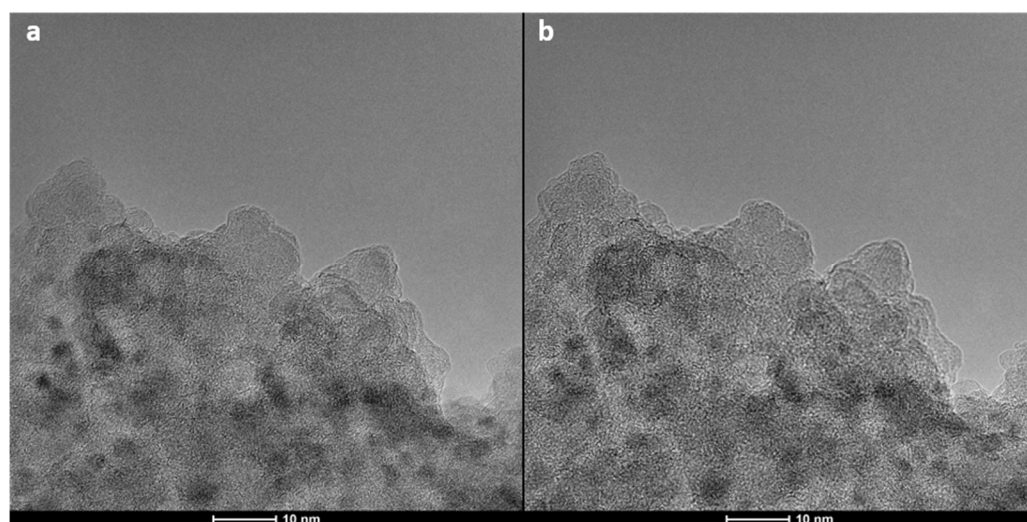

**Figure S3.** HR-TEM images with different defocus values of DNDs annealed at 1100 °C under vacuum.

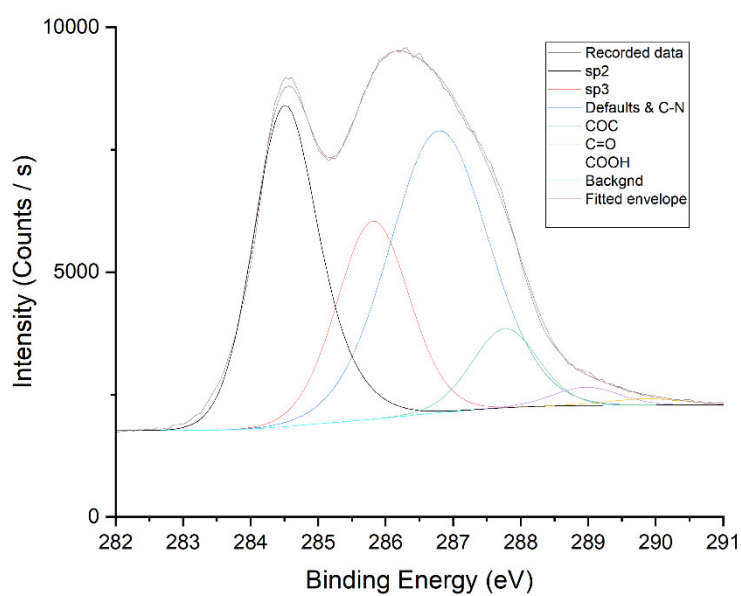

| Vacuum annealing |                   |                   |                                    |       |     |      |
|------------------|-------------------|-------------------|------------------------------------|-------|-----|------|
|                  | C sp <sup>2</sup> | C sp <sup>3</sup> | CH <sub>x</sub> , C-N,<br>defaults | C-O-C | C=O | COOH |
| 1100°C 4h        | 30,5              | 20                | 39,5                               | 7,5   | 2   | 0,5  |

**Figure S4.** Fitted XPS C1s core level of DNDs annealed at 1100 °C under vacuum and associated values.

As received DND



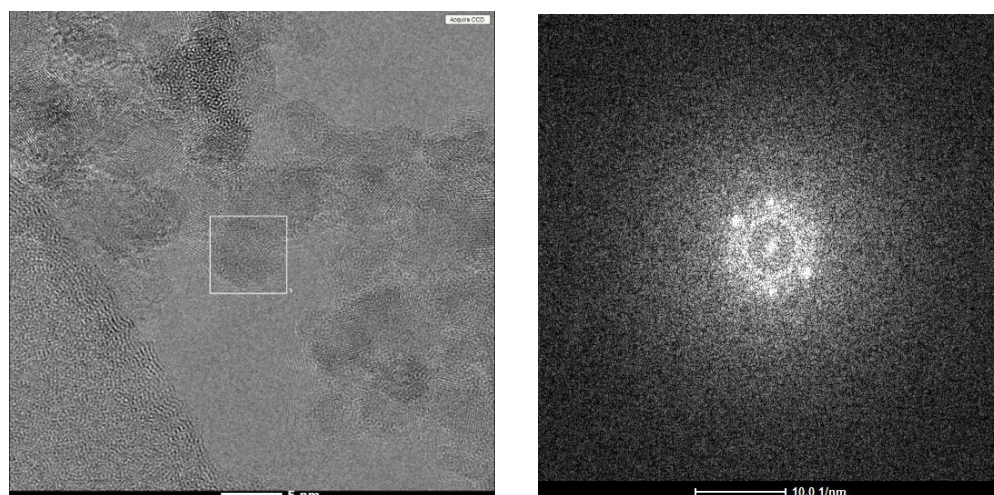

DND annealed under vacuum at 950 °C

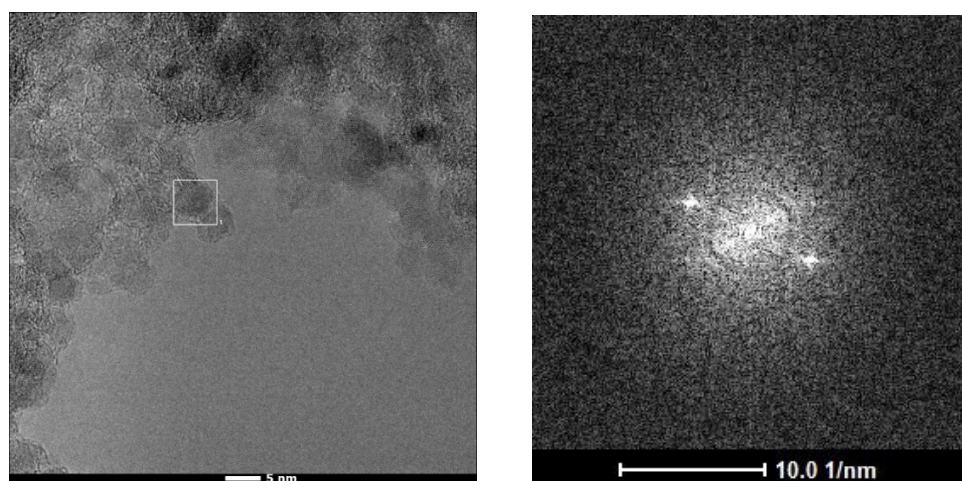

DND annealed under vacuum at 1100 °C

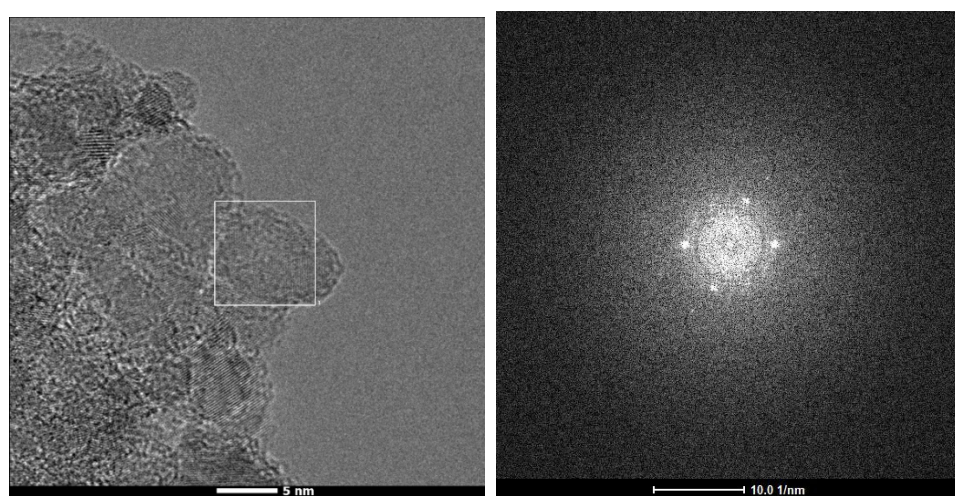

**Figure S5.** HR-TEM images (left) and FFT (right) performed in the area corresponding to the red square.
